# Supplementary material for: Population-Based Biomonitoring of Exposure to Organophosphate and Pyrethroid Pesticides in New York City
Source: PubMed Central journal article supplement (PMC3855501; doi:10.1289/ehp.1206015), 2013-09-27
Supplement: ehp.1206015.s001.508.pdf [file ehp.1206015.s001.508.pdf]

**Supplemental Material**  
**Population-Based Biomonitoring of Exposure to Organophosphate and  
Pyrethroid Pesticides in New York City**

Wendy McKelvey, J. Bryan Jacobson, Daniel Kass, Dana Boyd Barr, Mark Davis, Antonia M.  
Calafat, and Kenneth M. Aldous

Supplemental Material, Table S1. Multiple linear regression of natural log of urinary creatinine concentration ( $\mu\text{g/L}$ ) on participant characteristics using data from two analyses of urinary pesticide metabolites, NYC HANES, 2004

| Parameter                       | Data from Organophosphate Metabolite Analysis (n=863) |          | Data from Pyrethroid Metabolite Analysis (n=1,420) |          |
|---------------------------------|-------------------------------------------------------|----------|----------------------------------------------------|----------|
|                                 | $\beta$ (95% CI)                                      | Pr >  t  | $\beta$ (95% CI)                                   | Pr >  t  |
| Intercept                       | 4.657 (4.457, 4.858)                                  | < 0.0001 | 4.532 (4.346, 4.718)                               | < 0.0001 |
| Sex                             |                                                       |          |                                                    |          |
| Female                          | -0.251 (-0.339, -0.163)                               | < 0.0001 | -0.310 (-0.394, -0.217)                            | < 0.0001 |
| Male (Reference)                | 0                                                     | --       | 0                                                  | --       |
| Age (years)                     | -0.079 (-0.142, -0.017)                               | 0.0127   | -0.099 (-0.155, -0.043)                            | < 0.0001 |
| Race/Ethnicity                  |                                                       |          |                                                    |          |
| Hispanic                        | 0.202 (0.109, 0.295)                                  | < 0.0001 | 0.212 (0.110, 0.314)                               | < 0.0001 |
| Asian, Non-Hispanic             | 0.003 (-0.142, 0.148)                                 | 0.9684   | -0.014 (-0.157, 0.129)                             | 0.8512   |
| Black, Non-Hispanic             | 0.309 (0.196, 0.421)                                  | < 0.0001 | 0.359 (0.244, 0.475)                               | < 0.0001 |
| White, Non-Hispanic (Reference) | 0                                                     | --       | 0                                                  | --       |
| Body Weight (kg)                | 0.217 (0.157, 0.278)                                  | < 0.0001 | 0.158 (0.101, 0.216)                               | < 0.0001 |
